# Supplementary material
Source: PubMed Central journal article supplement (PMC2670682)
Supplement: 90342.2008_1.pdf [file 90342.2008_1.pdf]

S1 Kinetic Parameters from Non-linear Regression Analysis

| <b>[NSC306711]</b><br>( $\mu\text{M}$ ) | <b>Ki</b><br>( $\mu\text{M}$ ) | <b>Km<sup>app</sup></b><br>( $\mu\text{M}$ ) | <b>Vmax</b><br>(pmol/min/mg) |
|-----------------------------------------|--------------------------------|----------------------------------------------|------------------------------|
| 0                                       |                                | 0.143 $\pm$ 0.23                             | 12.65 $\pm$ 4.49             |
| 12.5                                    | 9.991                          | 0.323 $\pm$ 0.37                             | 14.70 $\pm$ 6.11             |
| 25                                      | 5.425                          | 0.805 $\pm$ 0.81                             | 18.73 $\pm$ 10.37            |
| 50                                      | 5.945                          | 1.350 $\pm$ 1.54                             | 19.42 $\pm$ 14.42            |
| 100                                     | 6.220                          | 2.450 $\pm$ 4.05                             | 13.30 $\pm$ 16.69            |
